# Supplementary material
Source: PubMed Central journal article supplement (PMC5467724)
Supplement: NIHMS72340-supplement-methods.pdf [file NIHMS72340-supplement-methods.pdf]

## 1 **Methods**

2 **Mice.** *Eng*<sup>flox/flox</sup> mice<sup>1</sup> were crossed with *Cdh5(PAC)-CreER<sup>T2</sup>* mice<sup>2</sup> to generate endothelial specific  
3 inducible *Eng* knockout. These mice were in turn crossed with transgenic fluorescent reporter mouse  
4 lines B6.Cg-Gt(*ROSA*)26Sor<sup>tm3(CAG-EYFP)Hze/J</sup> (Stock Number 007903, The Jackson Laboratory) or *R26R-*  
5 *H2B-mCherry* (Acc. No. [CDB0203K], [http://www.cdb.riken.jp/arg/reporter\\_mice.html](http://www.cdb.riken.jp/arg/reporter_mice.html))<sup>3</sup> allowing for  
6 *in vivo* lineage tracing and ex vivo time-lapse imaging. For induced gene knockout in neonatal mice,  
7 tamoxifen was administrated by postnatal intraperitoneal injections. *Eng* full knockout mice  
8 (*Eng*<sup>lacZ/lacZ</sup>) were generated in collaboration with Regeneron by targeted insertion of the *lacZ* gene  
9 into exon 2 of *Eng*. TgENG<sup>LoxP</sup> mice<sup>4</sup> were crossed with *Cdh5(PAC)-CreER<sup>T2</sup>* mice to generate  
10 endothelial specific inducible ENG overexpression. The ENG overexpression mice were then crossed  
11 with *Eng*<sup>flox/flox</sup> to generate *Eng*<sup>iΔEC+IOE</sup> mice. Both males and females are included. Animal housing and  
12 procedures were in accordance with Swedish legislation and approved by the local animal ethics  
13 committees.

14

15 **Tamoxifen administration.** 10 or 50 μg of tamoxifen was administrated by intraperitoneal (IP)  
16 injection at postnatal day (P) 1 or 4 to induce nearly complete gene knockout in neonatal mice. For  
17 mosaic *Eng* knockout, 3-10 μg of tamoxifen was administrated by IP injection at the indicated time  
18 point. For mosaic ENG overexpression in *Eng*<sup>iECOE</sup> or *Eng*<sup>iΔEC+IOE</sup> mice, 100 μg of tamoxifen was  
19 administrated by IP injection at P3.

20

21 ***In vivo* imaging and quantification of EC migration.** Mice received tamoxifen (0.2-1mg) one week  
22 prior cornea suture implantation. The cornea suture method was performed as previously described  
23 <sup>5</sup>. In brief, mice were anesthetized and 3 sutures of Nylon surgical silk (11-0, AROSurgical) were  
24 implanted per cornea (considered day 0). At days 5-7, mice were anaesthetized and the newly  
25 formed vasculature of the corneas was imaged utilising a Leica SP8 microscope (Leica microsystems)  
26 with 25x/1.0 objective. Z-stacks of epifluorescence images were acquired every 24 hours. Time-lapse  
27 bright field images were acquired to record blood flow direction. Displacement of ECs between two  
28 imaging time points, were defined by the distance to a selected reference point (adjacent vessel  
29 branches, or cells without relative change of distance to their neighbouring cells within 24 hours)  
30 using LAS AF built-in modules.

31

32 ***In vivo* VEGFR2 or AKT inhibition.** The mice (*Eng*<sup>flox/flox</sup>; *Cdh5(PAC)-CreER<sup>T2</sup>*) were injected with  
33 tamoxifen (50μg) at P3 followed by IP injection of SU5416 (20mg/kg/day, Sigma) or Wortmannin  
34 (0.3mg/kg/day, Sigma) from P4-P6. The same volume of DMSO was injected to corresponding  
35 genotypes, serving as controls. Mice were sacrificed at P7 and retinas processed for  
36 immunofluorescent analysis.

37

38 **Analysis of tip cell competence within retinal or brain vasculature of P7 mice.** Retinas or brains with  
39 15-90% recombination were used for the quantification. Contributions of recombined (YFP+) or non-  
40 recombined (YFP-) cells to tip-cell position were calculated as number of YFP+ tip cells/(YFP+/CD31+  
41 area) and number of YFP- tip cells/(YFP-/CD31+ area) followed by calculation of the ratio of the two  
42 for each sample. Tip cells in five different regions covering both cerebral cortex and striatum were  
43 counted and summed for each brain.

44

45 **Analysis of distribution of recombined cells in the retina.** Mosaic recombination was induced at P1  
46 by tamoxifen. Retinas were taken at P7 and stained for CD31, YFP and human ENG and flat mounted  
47 to slides by cutting into 4 leaflets. Images of whole retinas were taken by z-stack tile scanning with  
48 confocal microscope (Leica SP8). For each leaflet, general recombination ratio for *Eng* knockout was  
49 measured as YFP+ area/CD31+area in Volocity; recombination ratio for *Eng* overexpression was  
50 measured as human ENG+ area/CD31+ area. Arteries and veins were identified using several well-  
51 established criteria: Arteries have smaller diameter, fewer branches and higher smooth muscle cell  
52 coverage than veins. Also, arteries and veins appear in an alternating pattern in the retina. Areas  
53 within approximately 50  $\mu\text{m}$  around the main arteries and veins are defined as A and V regions  
54 respectively. Areas beyond these regions until capillary are defined as Vessels near A or Vessels near  
55 V regions. Regional recombination ratio was also measured in the same way as general  
56 recombination. The ratio of regional/total recombination was used to assess the distribution of  
57 recombined cells.

58

59 **Analysis of anatomical localisation of malformation initiation.** Mosaic recombination was induced  
60 at P4 by tamoxifen. Retinas were taken at P7 and stained for CD31 and  $\alpha\text{SMA}$  and mounted for  
61 imaging. Images of whole retinas were acquired by z-stack tile scanning with confocal microscope. A  
62 site of malformation was scored positive if the diameter of the vessel exceeded its respective feeding  
63 (arterioles, capillaries) or draining (venules, capillaries) vessel.

64

65 **Hypoxia detection in mouse retina.** Hypoxia in the retina was assessed by IP injection of 60mg/kg of  
66 pimonidazole (Hypoxyprobe) to P7 mice 90 min prior sacrifice. Eyes were fixed in 4%  
67 paraformaldehyde (PFA) for 2 hours at room temperature. Retinas were isolated and immunostained  
68 for CD31 and pimonidazole adducts.

69

70 **Aortic ring assay.** Thoracic aortas were taken from mice at P7 and cut into 1 mm rings after removal  
71 of the connective tissues. The rings were embedded between two layers of rat tail collagen, type I  
72 (Life technologies) and cultivated in Dulbecco's Modified Eagle's Medium (DMEM) supplemented  
73 with 10% foetal bovine serum (FBS) and VEGFA (Peprotech, 30 ng/ml). For growth factor treatment,  
74 medium was changed to DMEM with 2% BSA and with or without the inclusion of VEGFA (30 ng/ml)  
75 after 4 days or initial cultivation. Samples were fixed in 4% PFA and analysed by microscopy after  
76 immunostaining with antibodies.

77

78 **Live imaging and cell tracking in angiogenic sprouts of aortic rings.** Aortic rings were cultured as  
79 described above in 24-well glass bottom plates (Mattek) and imaged from day four using a Leica SP8  
80 laser confocal microscope system (Leica Microsystems; equipped with a motorized stage and a CO<sub>2</sub>  
81 incubator) maintained at 37°C and 5% CO<sub>2</sub> with a humidifier. Twenty-nine Z slices were acquired at  
82 each position every 20 minutes. Medium was changed every day until termination. Cellular migration  
83 was analysed using MTrackJ in ImageJ (NIH) and Imaris software (Bitplane). Single cell tracks were  
84 selected manually and data were collected for quantitative analysis of sprout elongation, cellular  
85 migration speed and directionality. Distances of the nuclei at the tip position from the first to the last  
86 time points were measured as elongation of sprouts. Migration speed of one cell was obtained by  
87 averaging the transient speed at each time point (measured by the software). The relative number of  
88 time-points a cell migrated towards the sprouting direction is defined as anterograde migration and

89 analogous for retrograde migration. A cell that migrated less than 2  $\mu\text{m}$  between two time points was  
90 defined “still”. 17-38 cells were measured for each genotype or treatment. Statistics were analysed  
91 using Prism 5.0 software (GraphPad).

92

93 **Cell culture.** HDMECs (PromoCell) were cultured in endothelial cell growth medium MV2 with  
94 supplied supplements (PromoCell). The cell lines were authenticated by the vendor (Promocell) for  
95 cell morphology and cell-type specific markers using flow cytometric analyses. The cell lines were not  
96 authenticated thereafter. The cell lines were tested for mycoplasma contamination by the vendor  
97 (Promocell). The cell lines were not tested for mycoplasma contamination thereafter. No cell lines  
98 used in this study are found in the database of commonly misidentified cell lines (ICLAC and NCBI  
99 Biosample). For VEGFA stimulation, sub-confluent cells were starved in MV2 with 0.2% FBS without  
100 supplements for 5 hours. The same medium with VEGFA (50 ng/ml) was then added to the cells and  
101 incubated at 37°C. Cells were lysed at indicated time points for total or membrane protein isolation  
102 or fixed immediately in 4% PFA for antibody staining.

103

104 **Isolation of mouse lung ECs.** Isolation of ECs from mouse lung was done by using anti-CD31-antibody  
105 (BD Pharmingen)-conjugated dynabeads (Life Technologies) as previously described<sup>6</sup>. Cells were  
106 cultured in MV2 medium (PromoCell) with 4-OH-tamoxifen (5 $\mu\text{M}$ , Sigma) for 5 days before splitting  
107 for experiments.

108

109 **Flow-mediated behavioural analysis.** HDMECs or mouse lung ECs were seed fully confluent in a flow  
110 chamber (CellDirector 2D, Gradientech) and cultured in incubator for 3 hours before experiment. The  
111 chamber was then connected to a syringe pump and placed on microscope (equipped with cell  
112 culture system) for imaging. Pre-warmed endothelial cell growth medium MV2 was pumped through  
113 the flow chamber with a flow rate of 150 $\mu\text{l}/\text{min}$  (7.5 dyne/cm<sup>2</sup>). For VEGFR2 or AKT inhibition SU5416  
114 (5 $\mu\text{M}$ ) or Wortmannin (100nM) was added to the medium. Bright field images were taken every 5  
115 minutes for 5 hours. Cellular migration was analysed using MTrackJ in ImageJ.

116

117 **RNA interference.** Lentivirus was used to introduce specific short hairpin RNAs (shRNA) into  
118 HDMECs. The lentiviral vector pLKO.1-TRC was a gift from David Root (Addgene plasmid #10878). The  
119 oligonucleotide sequences used to target human *ENG* were selected from the MISSION shRNA library  
120 (TRCN0000083142, Sigma). The control shRNA sequence lacks targets (5'-  
121 CCTAAGGTTAAGTCGCCCTCG-3'), (Addgene, plasmid #1864). Lentiviruses were generated using the  
122 packaging cell line 293FT. Supernatants containing viral particles were collected at 48 and 72 hour  
123 after transfection. Viral supernatants were diluted 1:5 and supplemented with polybrene (8  $\mu\text{g}/\text{mL}$ )  
124 for infection of HDMECs. The virus-containing medium was replaced with fresh medium 24 hours  
125 after infection. The cells were selected by puromycin (1 $\mu\text{g}/\text{ml}$ ) for 7days and then split for  
126 experiments.

127

128 **Immunofluorescence.** Mice were sacrificed and brains and eyes immediately removed and fixed in  
129 4% PFA. Brain coronal sections (200  $\mu\text{m}$  thickness) were generated using a vibratome. Retinas were  
130 dissected and processed for whole mount antibody staining. Samples were incubated in phosphate  
131 buffered saline (PBS) with 0.5% triton X-100 and 1% BSA for 3 hours at room temperature and then  
132 with primary antibodies in the same solution overnight at 4°C with agitation. After

133 3 washes at room temperature, samples were incubated with secondary antibodies overnight at 4°C,  
134 washed 3 times and mounted to slides for imaging.

135 For staining of cell lines, cells were cultured on coverslips and fixed in 4% PFA after  
136 treatment. After fixation, the cells were washed 3 times in PBS and permeabilized in PBS with 0.1%  
137 tritonX-100 for 5 minutes, followed by block in 1% BSA for 30 minutes and incubation with primary  
138 antibodies overnight at 4°C. Cells were washed 3 times in 0.1% tritonX-100 and incubated with  
139 secondary antibodies for 1 hour at room temperature. They were then washed 3 times and mounted  
140 to slides for imaging. Specimens were imaged by LSM 700 (Carl Zeiss AG) or Leica SP8 (Leica  
141 Microsystems) laser confocal microscopes. Image processing and analysis was done using Volocity  
142 (PerkinElmer) and ImageJ software.

143 Antibodies: mouse anti  $\alpha$ -smooth muscle actin (ASMA) (Clone: 1A4)(C6198, Sigma, 1:100);  
144 goat anti-mouse CD31 (AF3628, R&D Systems, 1:500); rat anti-Endoglin (Clone: MJ7/18)(14-1051,  
145 eBioscience, 1:400); chicken anti-GFP (ab13970, Abcam, 1:1000); rabbit anti-ERG (Clone:  
146 EPR3864)(ab92513, Abcam, 1:500); rabbit anti-VEGFR2 (Clone: 55B11)(2479, Cell Signaling, 1:200);  
147 goat anti-VEGFR2 (AF357, R&D Systems, 1:200); mouse anti-human Endoglin (Clone: SN6)(14-1057-  
148 82, eBiosciences, 1:200); goat anti human Endoglin (AF1097, R&D systems, 1:500); alexa555-mouse  
149 anti-GM130 (Clone: 35/GM130)(560066, BD, 1:200); mouse anti-EEA1 (Clone:  
150 mAbcam18175)(ab18175, Abcam, 1:500); rabbit anti-Rab5 (Clone: C8B1)(3547S, Cell signaling,  
151 1:200); rabbit anti-Rab7 (Clone: D95F2)(9367S, Cell signaling, 1:200); goat anti-Calnexin (sc6465,  
152 Santa Cruz, 1:200). Secondary antibodies conjugated with Alexa Fluor dyes were obtained from Life  
153 Technologies or Jackson ImmunoResearch Laboratories.

154 **Proliferation.** Proliferation in the developing brain and retina was assessed by IP injection of 5-  
155 ethynyl-2'-deoxyuridine (EdU, 100  $\mu$ g/mouse) at postnatal day 7. Mice were sacrificed 2 hours after  
156 injection and brains and retinas were removed and fixed in 4% PFA. EdU staining on brain coronal  
157 vibratome sections (200  $\mu$ m thickness) or retinas was done according to the instruction of Click-iT  
158 EdU imaging kit (Life Technologies) apart from 3 hours incubation in the reaction mix at room  
159 temperature. The samples were co-stained for ERG for EC identification as described above. Images  
160 were taken by confocal microscope and analysed using Volocity software. Percentages of  
161 proliferative ECs among non-recombined ECs are calculated as: mCherry-, ERG+, EdU+ cells/mCherry-  
162 , ERG+ cells; percentages of proliferative ECs among recombined ECs are calculated as: mCherry+,  
163 ERG+, EdU+ cells/mCherry+, ERG+ cells.

164

165 **Quantitative PCR.** RNA was extracted and purified using RNeasy Plus kit (Qiagen). RNA  
166 concentrations were measured by Nanodrop spectrophotometer (ThermoFisher Scientific) and  
167 adjusted to equal, followed by reverse transcription using SuperScript III (Life Technology). Real-time  
168 quantitative PCR were performed on ABI 7300 real-time PCR machine using SYBR Green master mix  
169 (Kapa Biosystem). Housekeeping gene ribosomal protein L19 (*Rpl19*) was used as internal control.  
170 The comparative Ct method was used to calculate fold differences.

171 Primers for mouse genes: *Cxcr4*, forward: 5'-TCAGTGGCTGACCTCCTCTT-3', reverse: 5'-  
172 TTTCAGCCAGCAGTTTCCTT-3'; *Dll4*, forward: 5'-CAGAGACTTCGCCAGGAAAC-3', reverse: 5'-  
173 TCATTTTGCTCGTCTGTTTCG-3'; *Eng*, forward: 5'-CTTCCAAGGACAGCCAAGAG-3', reverse: 5'-  
174 TTCTGGCAAGCACAGAATG-3'; *Hey1*, forward: 5'-GAGACCATCGAGGTGGAAAA-3', reverse: 5'-  
175 CTTCTCGATGATGCCTCTCC-3'; *Id1*, forward: 5'-GGTACTTGGTCTGTCGGAGC-3', reverse: 5'-  
176 TCATGTCGTAGAGCAGGACG-3'; *Rpl19*, forward: 5'-GGTGACCTGGATGAGAAGGA-3', reverse: 5'-

177 TTCAGCTTGTGGATGTGCTC-3'; *Vegfa*, forward: 5'- AGCACAGCAGATGTGAATGC-3', reverse: 5'-  
178 AATGCTTTCTCCGCTCTGAA-3'; *Efnb2*, forward: 5'- AGGAATCACGGTCCAACAAG-3', reverse: 5'-  
179 GTCTCCTGCGGTACTTGAGC-3'.  
180 Primers for human genes: *ENG*, forward: 5'- CACTAGCCAGGTCTCGAAGG-3', reverse: 5'-  
181 CTGAGGACCAGAAGCACCTC-3'; *JAG1*, forward: 5'- AGGCCGTTGCTGACTTAG-3'; reverse: 5'-  
182 GCAGAAGTGGGAGCTCAA-3'; *KLF2*, forward: 5'- CCTCCCAAAGTGTGACTGGT -3', reverse: 5'-  
183 ACTCGTCAAGGAGGATCGTG-3'; *HEY1*, forward: 5'- CGAGGTGGAGAAGGAGAGTG-3', reverse: 5'-  
184 GCGCGTCAAAGTAACCTTTC-3'.

185

186 **X-gal staining.** Fresh brain sections or retinas fixed in 4% PFA for 1h at 4°C were washed in rinse  
187 buffer (0.1 M Phosphate buffer (pH 7.3), 2 mM MgCl<sub>2</sub>, 0.01% sodium deoxycholate, 0.02% Nonidet P-  
188 40) twice, followed by incubation in staining solution (0.1 M Phosphate buffer (pH 7.3), 2 mM MgCl<sub>2</sub>,  
189 0.01% sodium deoxycholate, 0.02% Nonidet P-40, 5 mM potassiumferricyanide, 5 mM  
190 potassiumferrocyanide, 1 mg/ml X-gal) for 1-2 hours at 37°C and then washed in rinse buffer twice,  
191 20 minutes each time at room temperature. Samples were then post fixed in 4% PFA for 10 min and  
192 continue with immunostaining with antibodies.

193

194 **Sorting (FACS) of brain ECs from mice harbouring conditional fluorescent reporters.** P7 pups with  
195 conditional EC-specific fluorescent reporters were anesthetized and perfused with 2 ml Hank's  
196 Balanced Salt Solution (HBSS). Pups were then decapitated and brains were transferred to tubes with  
197 cold PBS (without Ca or Mg) with 2mM EDTA and 1% BSA and then cut into small pieces with scalpel.  
198 Materials were transferred into a 15 ml tube containing 10 ml pre-warmed trypsin (0.05%), rotated  
199 end-over-end at 37°C for 12 minutes. Cell suspension was pipetted up and down for several times  
200 and passed through a 40 µm cell strainer into a 50 ml tube on ice. Cells were spun down at 400g at  
201 4°C and re-suspended in cold PBS (without Ca or Mg) with 2mM EDTA and 1% BSA to a concentration  
202 of 1-40×10<sup>6</sup> cells/ml. GFP+, mCherry- and GFP+, mCherry+ cells were sorted simultaneously by FACS  
203 (BD FACSARIA III) into RNAlater (Sigma) in different tubes. RNA was extracted using RNeasy micro kit  
204 (Qiagen).

205

206 **Surface biotinylation.** HDMECs (PromoCell), transduced with either control shRNA or Endoglin  
207 targeting shRNA, were starved for 4 h in Endothelial Cell Basal Medium MV2 with 0.2% FBS.  
208 Following the starvation, the transduced HDMECs were stimulated for 10, 30 or 60 min with 50 ng/ml  
209 VEGFA (Peprotech). For the biotinylation of surface proteins after the stimulation, the cells were  
210 washed twice with ice cold PBS and incubated with 0.5 mg/ml Sulfo-NHS-biotin (EZ-Link, Thermo  
211 Scientific) for 30 min at 4°C. To block the remaining reactive biotin, cells were washed twice with ice  
212 cold PBS containing 100 mM Glycine. Then cells were lysed in lysis-buffer (50 mM Tris-HCl pH7.5, 150  
213 mM NaCl, 1% Igepal CA-630, 1% Triton X-100 (Sigma)) supplemented with protease and phosphatase  
214 inhibitor cocktails (Roche), Complete and PhosSTOP (Roche), respectively, for 60 min at 4°C. Insoluble  
215 cell debris were pelleted by centrifugation for 15 min at 4°C with 14000 x g. Input protein samples  
216 were taken from the supernatant, mixed with β-Mercaptoethanol-containing Laemmli-buffer, boiled  
217 and frozen for later use at -20°C. Biotinylated proteins were precipitated by adding the supernatant  
218 to Streptavidin-sepharose beads (GE Healthcare) and their incubation for 16 h at 4°C, end-over-end.  
219 The Streptavidin-sepharose beads were then washed with ice cold TBS and proteins were denatured  
220 and released from the beads by boiling in β-Mercaptoethanol-containing Laemmli buffer.

221

222 **Immunoprecipitation.** The transduced HDMECs were starved for 4 h in Endothelial Cell Basal  
223 Medium MV2 with 0.2% FBS. Following the starvation, the cells were stimulated for 5, 10, 15 or 30  
224 minutes with 50 ng/ml VEGFA and lysed on ice in lysis buffer (50 mM Tris-HCl pH 7.5, 5 mM EDTA, 150  
225 mM NaCl, 0.5% NP-40) supplemented with protease and phosphatase inhibitor cocktails, Complete  
226 and PhosSTOP. Lysates were incubated with VEGFR2 antibody (55B11, Cell Signalling) coupled to  
227 Protein G beads, overnight at 4°C. Beads were washed 5 times with lysis buffer and proteins were  
228 denatured and released from the beads by boiling in  $\beta$ -Mercaptoethanol-containing Laemmli buffer.  
229

230 **Western blot.** The protein samples were separated on a SDS-PAGE (4-12% gradient gel) (Life  
231 Technologies), transferred to nitrocellulose membranes (Life Technologies), and incubated  
232 sequentially with primary and appropriate horseradish peroxidase (HRP) conjugated secondary  
233 antibodies. Signals were detected using the ECLprime reagent kit (GE Healthcare). Pictures were  
234 obtained by the imaging system FluroChem Q (AlphaInnotec) and analysed using ImageJ software.  
235 The following antibodies were used: mouse anti-Endoglin (Clone: SN6)(14-1057-82,  
236 eBioscience); rabbit anti-VEGFR2 (Clone: 55B11)(2479, Cell Signaling); mouse anti-phospho Tyrosine  
237 (Clone: 4G10) (16-103, Millipore); mouse anti-phospho Tyrosine (Clone: PY99) (sc-7020, Santa Cruz  
238 Biotechnology) rabbit anti-Endoglin (ab135528, AbCam); rabbit anti-phospho ERK-1/2 (D.13.14.4E)  
239 (T202/Y204) (4370, Cell Signaling); mouse anti-total ERK-1/2 (Clone: L34F12) (4696, Cell Signalling)  
240 goat anti-Calnexin (sc-6465, Santa Cruz Biotechnology); rabbit anti-p\*Akt (Ser473)( Clone: D9E)(4060,  
241 Cell Signaling); rabbit anti-panAKT (Clone: C67E7)(4691, Cell Signaling); mouse anti pan-AKT (Clone:  
242 40D4) (2920, Cell Signaling), sheep anti-mouse IgG HRP (RPN4201, GE Healthcare); goat anti-rabbit  
243 IgG HRP (RPN4301, GE Healthcare). For detection of the complete biotinylated protein fraction,  
244 membranes were probed with Streptavidin-HRP (GE Healthcare). Primary antibodies were used at a  
245 dilution of 1:1000, secondary antibodies were used at a dilution of 1:7500. Dilution for Streptavidin-  
246 HRP is 1:2500.

247 **Statistics and Reproducibility.** Statistical analysis was performed using GraphPad Prism software.  
248 Statistical significance in figures 1c, 1d, 2c, 2e, 2g, 2i, 2k, 2m, 3c-h, 4d, 4e, 4g, 5b, 5d, 5f, 5h, 5j, 5l, 6b,  
249 6d-i, 7i, 8b, 8c and Supplementary Fig. 6d-f, 8a, 8b was determined by unpaired two-tailed Student's  
250 t-test. Chi-square test was used in 6l. Two-way ANOVA was used to compare between groups in time  
251 course experiments (figures 7b, 7d, 7f-g, 7j). Variances were similar between the groups compared.  
252 Differences were considered significant with a  $P < 0.05$ . For animal experiments, no statistical  
253 methods were used for predetermine sample size. The experiments were not randomized. The  
254 investigators were not blinded to allocation during experiment and outcome assessment.  
255

256 **Data availability.** Source data for Fig. 1d, 2g, 2m, 4d, 6f-i, 7b, 7d, 7f, 7g, 7i, 7j have been provided as  
257 Supplementary Table 1. All other data supporting the findings of this study are available from the  
258 corresponding author on request.  
259

260

## 261 References

262 42. Allinson, K.R., Carvalho, R.L., van den Brink, S., Mummery, C.L. & Arthur, H.M. Generation of  
263 a floxed allele of the mouse Endoglin gene. *Genesis* **45**, 391-395 (2007).

- 264 43. Wang, Y. *et al.* Ephrin-B2 controls VEGF-induced angiogenesis and lymphangiogenesis.  
265 *Nature* **465**, 483-486 (2010).
- 266 44. Abe, T. *et al.* Establishment of conditional reporter mouse lines at ROSA26 locus for live cell  
267 imaging. *Genesis* **49**, 579-590 (2011).
- 268 45. Mancini, M.L. *et al.* Endoglin plays distinct roles in vascular smooth muscle cell recruitment  
269 and regulation of arteriovenous identity during angiogenesis. *Developmental dynamics : an*  
270 *official publication of the American Association of Anatomists* **238**, 2479-2493 (2009).
- 271 46. Kilarski, W.W., Samolov, B., Petersson, L., Kvanta, A. & Gerwins, P. Biomechanical regulation  
272 of blood vessel growth during tissue vascularization. *Nat Med* **15**, 657-664 (2009).
- 273 47. Sobczak, M., Dargatz, J. & Chrzanowska-Wodnicka, M. Isolation and culture of pulmonary  
274 endothelial cells from neonatal mice. *J Vis Exp* (2010).

275

276
