# Supplementary material
Source: PubMed Central journal article supplement (PMC5467724)

Supplementary Figure 9 (Jakobsson)

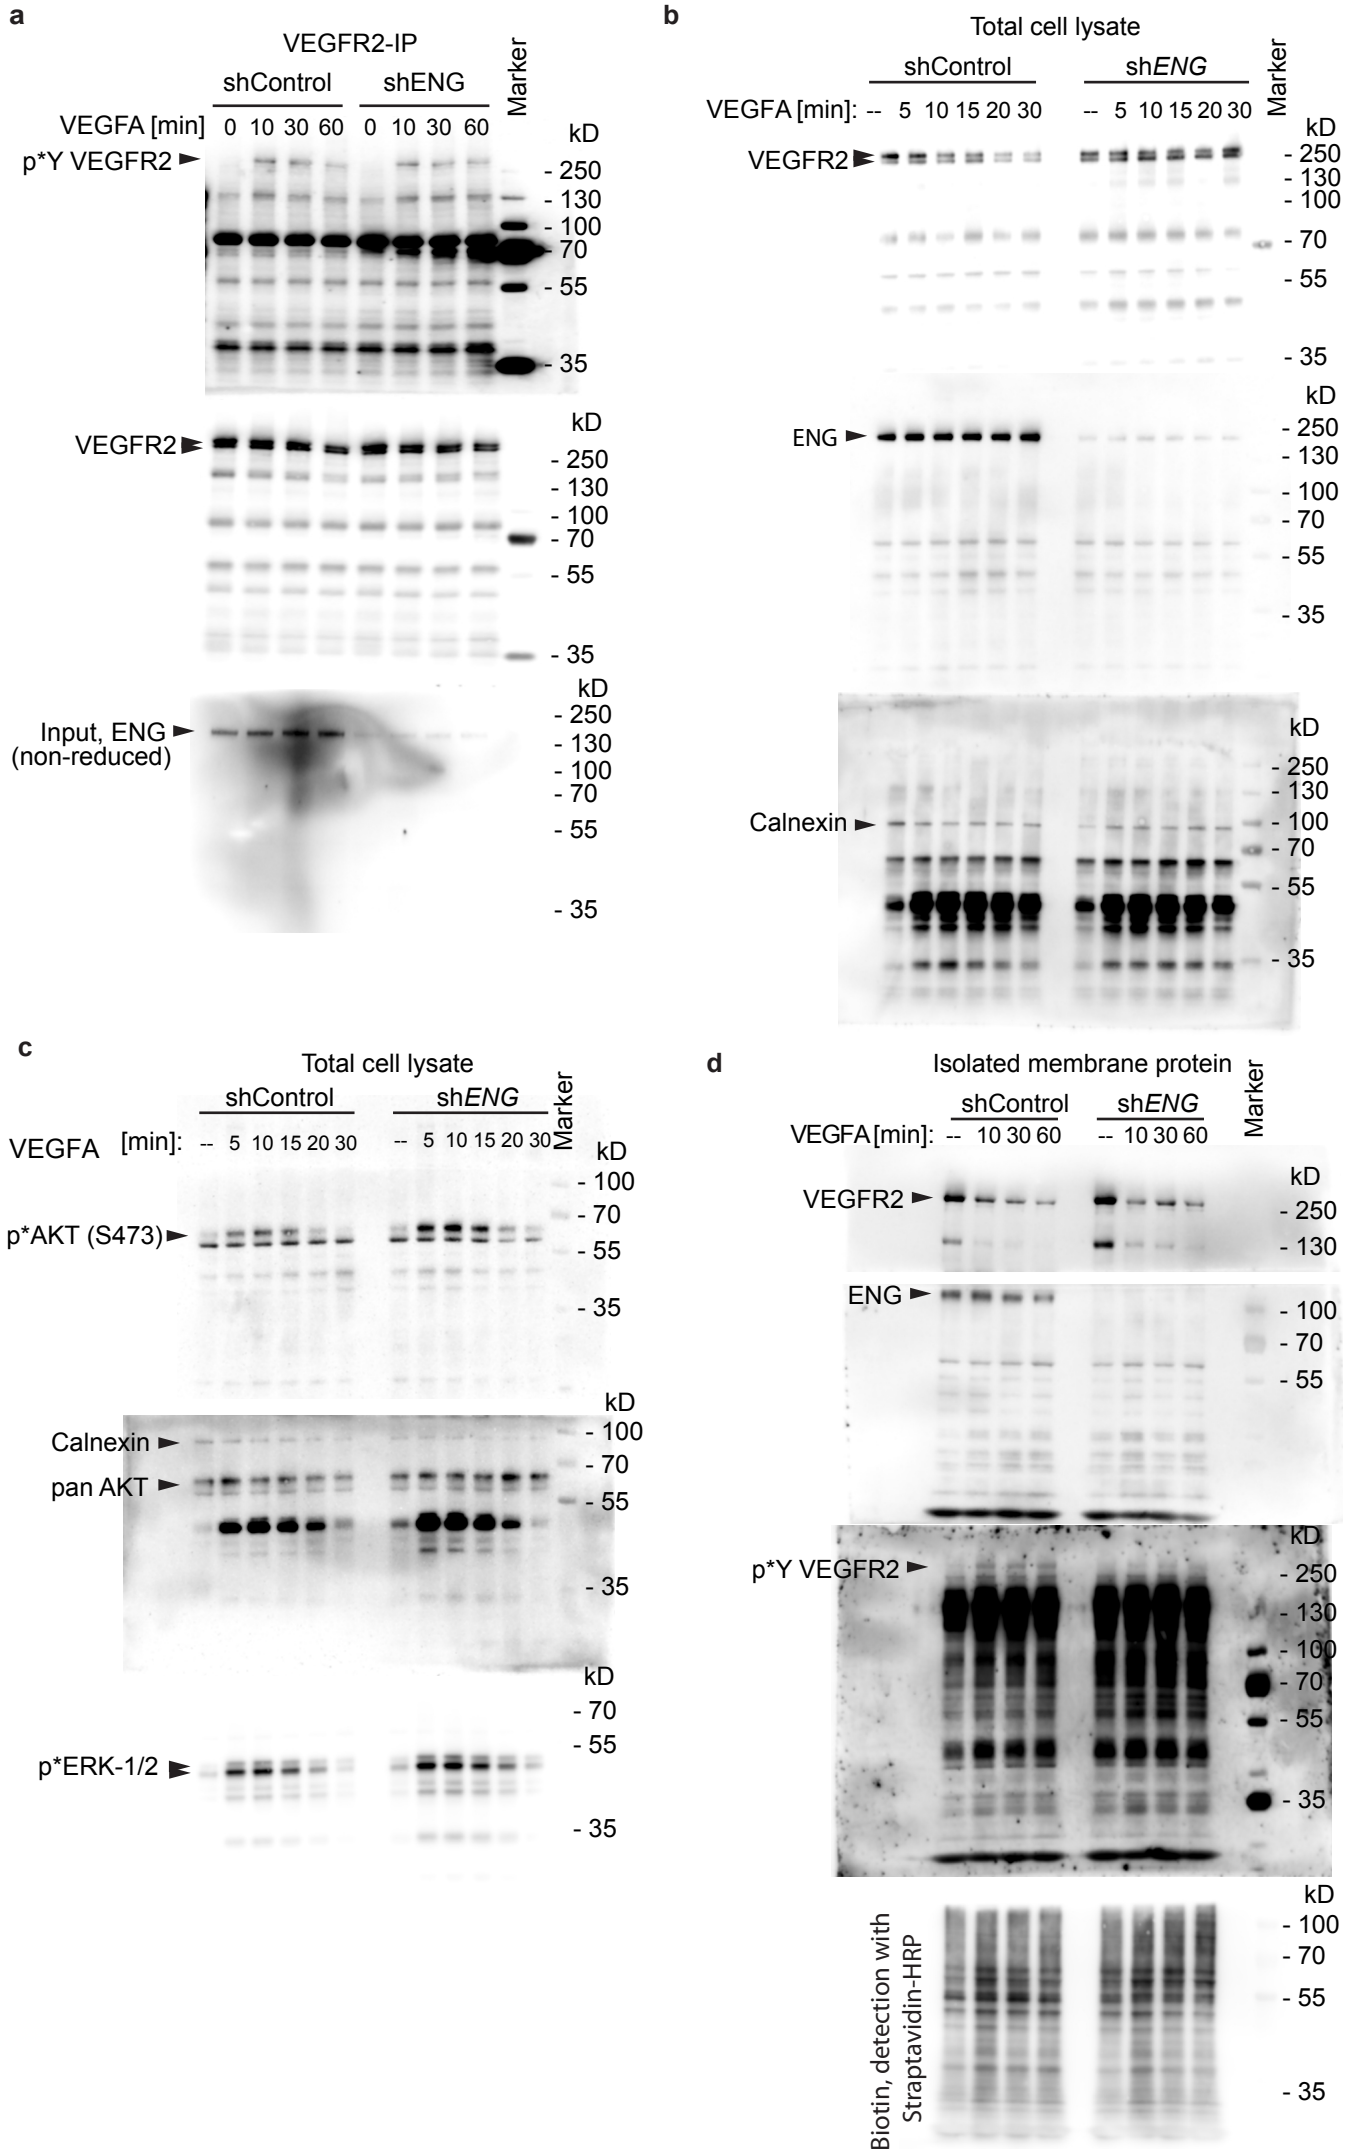

Supplement: NIHMS72340-supplement-Supplementary_Figure_9.pdf [file NIHMS72340-supplement-Supplementary_Figure_9.pdf]
